# Supplementary material for: An artificially re-structured PEDOT:PSS/konjac glucomannan sponge toward high-performance electromagnetic interference shielding from gigahertz to terahertz bands
Source: Royal Society of Chemistry journal article supplement (doi:10.1039/d3ta04882a), 2023-01-01
Supplement: d3ta04882a1.pdf [file d3ta04882a1.pdf]

## Supplementary Information

Haowen Sun, Zihao Wo, Yier Su, Hua Ma, Xiwen Zhang\*

State Key Laboratory of Silicon and Advanced Semiconductor Materials, School of  
Materials Science and Engineering, Zhejiang University, Hangzhou, 310027, China.

E-mail address: zhangxw@zju.edu.cn

\*Corresponding author.

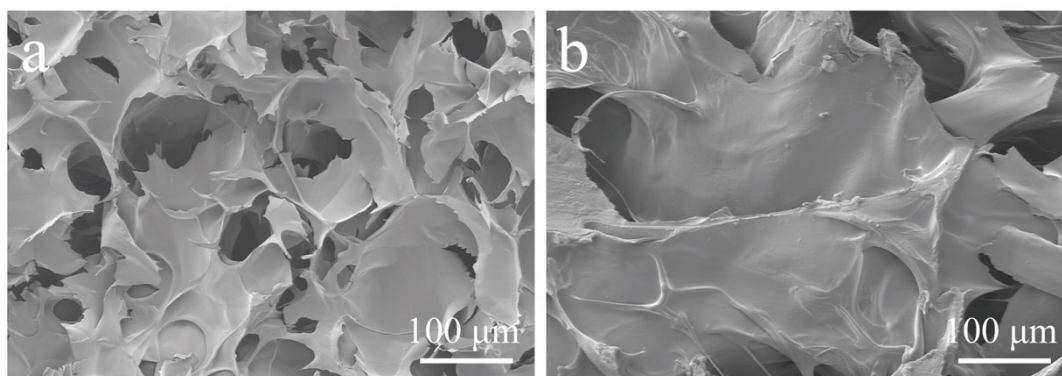

**Fig. S1.** SEM images of internal structure of (a) D0 and (b) D75.

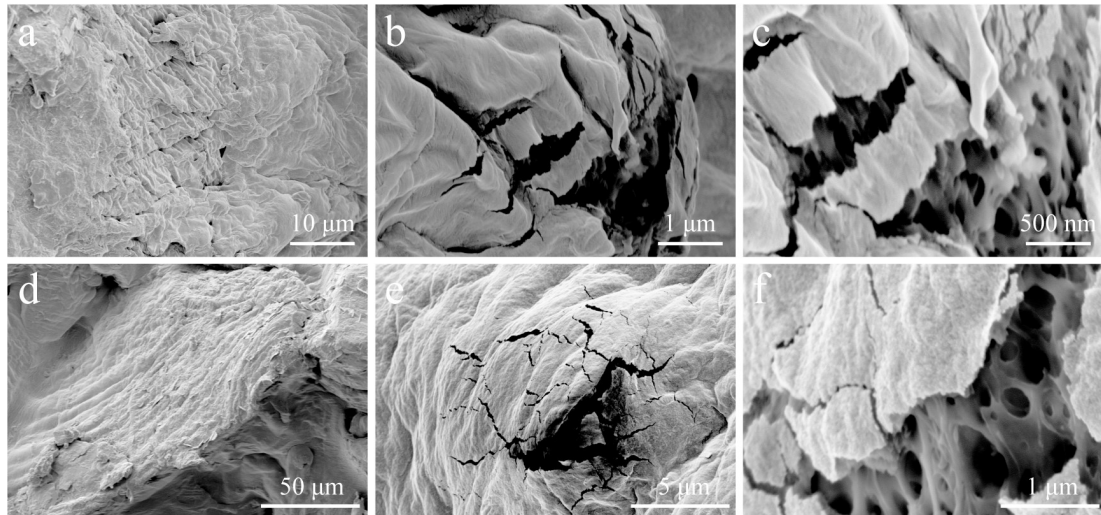

**Fig. S2.** Detailed appearance of electron beams at 15 kV smashing the external membrane of PPK sponges' structure units, (a), (b), (c) for first spot, and (d), (e), (f) for second spot.

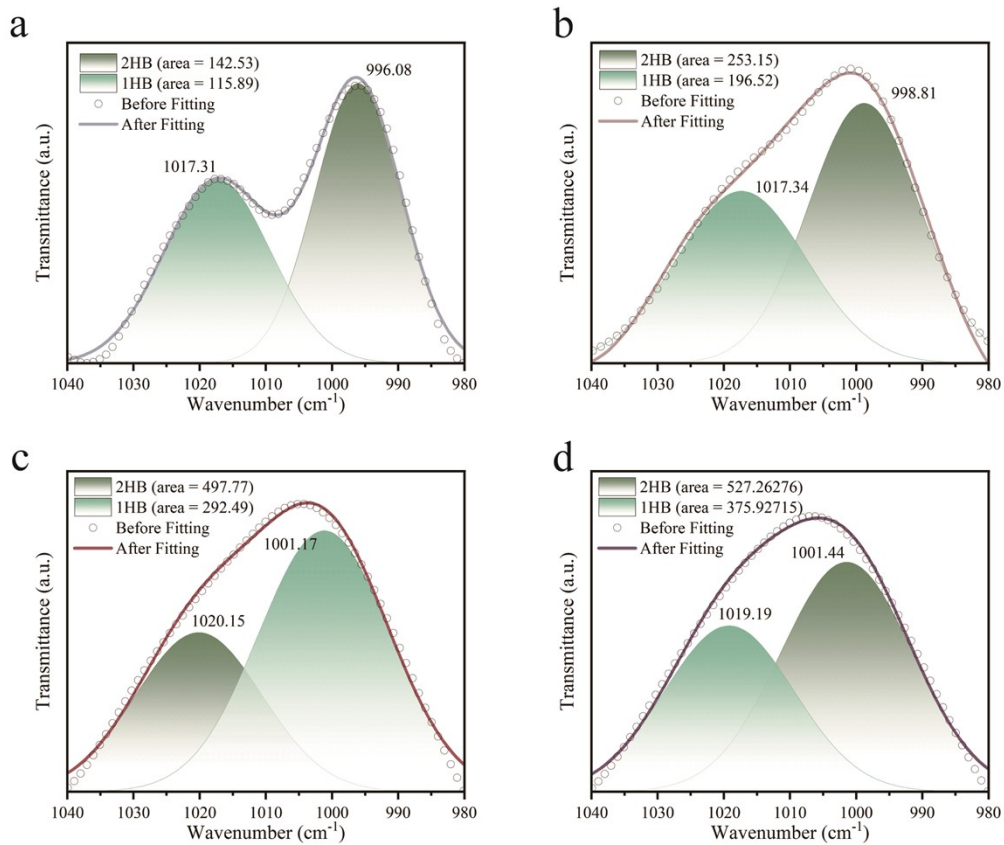

**Fig. S3.** Curve-fitting results of FTIR spectra in the range of 1040~980  $\text{cm}^{-1}$  of (a)D75, (b)D150, (c)D300, (d)D500.

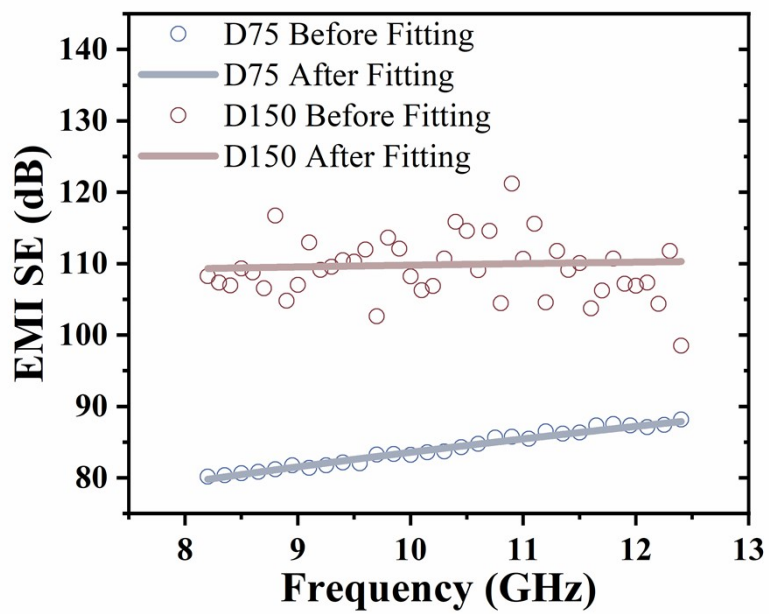

**Fig. S4.** Fitting of EMI SE of D75 and D150.

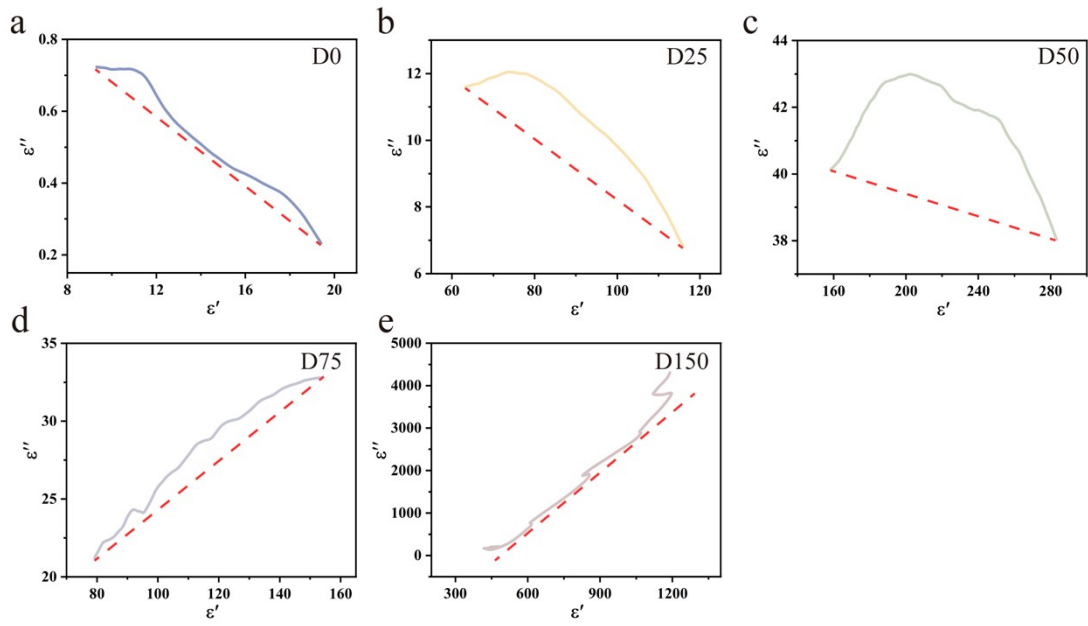

**Fig. S5.** Cole-Cole curves of the PPK sponges.

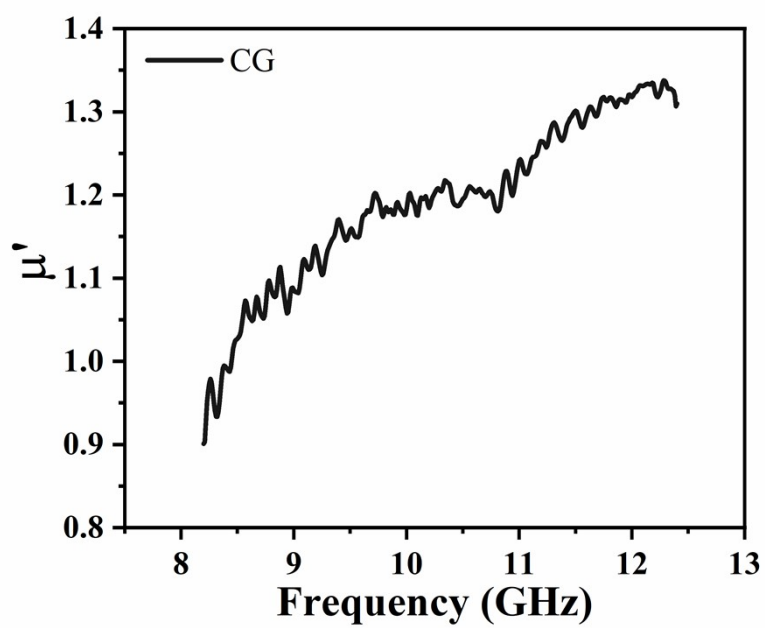

**Fig. S6.** The real part of permeability of CG in GHz band.

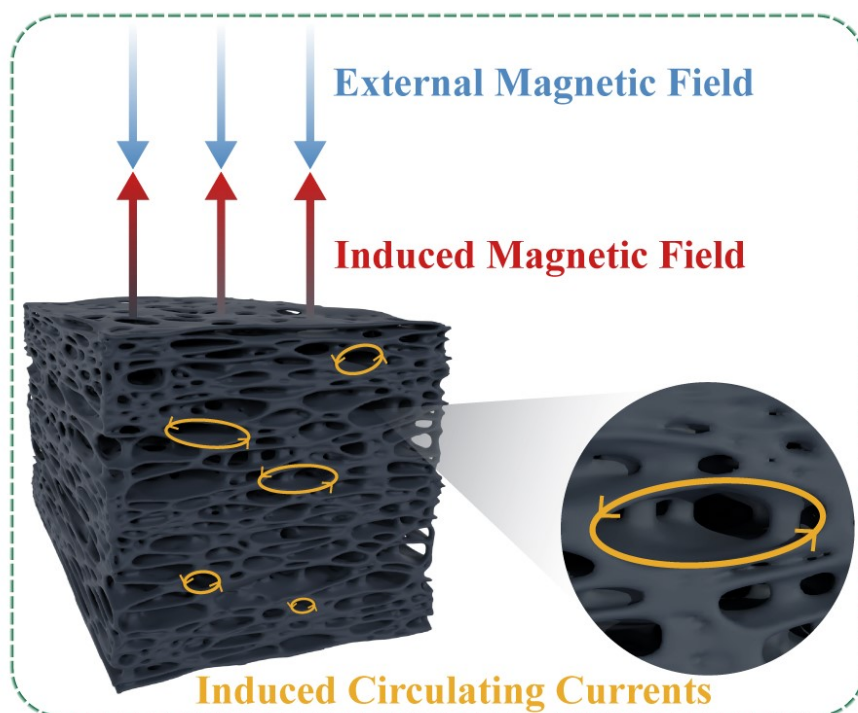

**Fig. S7.** Induced circulating currents in PPK sponges.

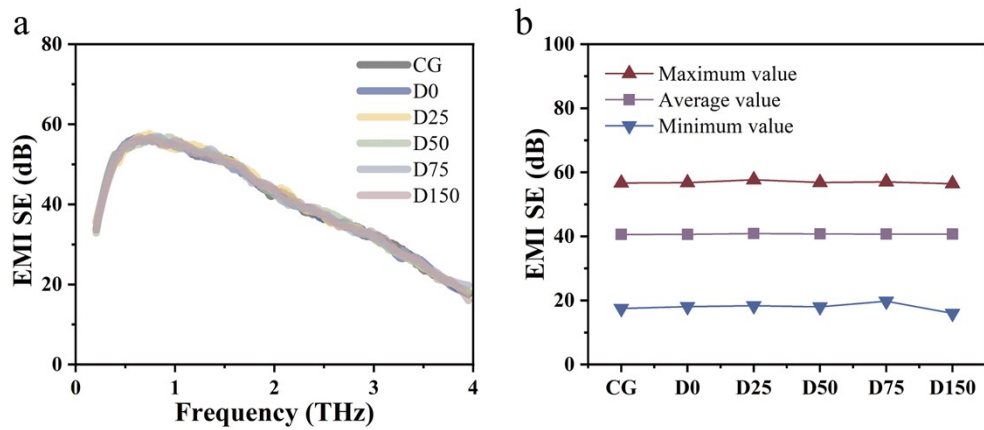

**Fig. S8.** EMI SE of CG and PPK sponges in THz band.



**Table S1.** EMI SE values of PPK sponges and control group.

| <b>Sample</b> | <b>Thickness<br/>(mm)</b> | <b>Apparent<br/>density<br/>(g/cm<sup>3</sup>)</b> | <b>Electrical<br/>conductivity<br/>(S/cm)</b> | <b>SE<sub>total</sub> (dB)</b> | <b>SSE<sub>total</sub><br/>(dB·cm<sup>3</sup>/g)</b> |
|---------------|---------------------------|----------------------------------------------------|-----------------------------------------------|--------------------------------|------------------------------------------------------|
| <b>CG</b>     | <b>0.132</b>              | <b>1.591</b>                                       | <b>15.038</b>                                 | <b>46.505</b>                  | <b>29.232</b>                                        |
| <b>D0</b>     | <b>5.809</b>              | <b>0.067</b>                                       | <b>0.241</b>                                  | <b>55.116</b>                  | <b>819.916</b>                                       |
| <b>D25</b>    | <b>4.787</b>              | <b>0.126</b>                                       | <b>0.302</b>                                  | <b>58.744</b>                  | <b>465.009</b>                                       |
| <b>D50</b>    | <b>3.559</b>              | <b>0.161</b>                                       | <b>0.432</b>                                  | <b>64.958</b>                  | <b>403.401</b>                                       |
| <b>D75</b>    | <b>2.744</b>              | <b>0.327</b>                                       | <b>1.161</b>                                  | <b>84.047</b>                  | <b>256.722</b>                                       |
| <b>D150</b>   | <b>1.635</b>              | <b>1.040</b>                                       | <b>3.831</b>                                  | <b>109.841</b>                 | <b>105.597</b>                                       |

**Table S2.** Direct comparison of THz EMI shielding performance of PPK sponges in this work with reported materials.

| <b>Ref.</b>      | <b>Form</b>   | <b>Shielding filler</b>                | <b>Qualified band (THz)</b> | <b>Qualified bandidth</b> | <b>Max EMI SE (dB)</b> |
|------------------|---------------|----------------------------------------|-----------------------------|---------------------------|------------------------|
| <b>1</b>         | <b>Film</b>   | <b>MXene</b>                           | <b>0.2~1.6</b>              | <b>37.93%</b>             | <b>64.9</b>            |
| <b>2</b>         | <b>Film</b>   | <b>MXene</b>                           | <b>0.2~1.6</b>              | <b>37.93%</b>             | <b>52.7</b>            |
| <b>3</b>         | <b>Film</b>   | <b>Fe<sub>3</sub>O<sub>4</sub>/CNF</b> | <b>0.2~1.2</b>              | <b>27.09%</b>             | <b>60.0</b>            |
| <b>4</b>         | <b>Film</b>   | <b>MXene/GO/metalion</b>               | <b>0.2~2.0</b>              | <b>48.77%</b>             | <b>51.0</b>            |
| <b>5</b>         | <b>Film</b>   | <b>MXene/rGO</b>                       | <b>0.4~2.0</b>              | <b>44.16%</b>             | <b>54.2</b>            |
| <b>6</b>         | <b>Film</b>   | <b>CNF</b>                             | <b>0.3~1.2</b>              | <b>24.38%</b>             | <b>44.0</b>            |
| <b>7</b>         | <b>Sponge</b> | <b>MXene</b>                           | <b>0.3~1.7</b>              | <b>36.58%</b>             | <b>65.0</b>            |
| <b>8</b>         | <b>Sponge</b> | <b>GO/CNF</b>                          | <b>0.3~1.5</b>              | <b>32.51%</b>             | <b>34.0</b>            |
| <b>9</b>         | <b>Sponge</b> | <b>Carbon</b>                          | <b>0.4~2.0</b>              | <b>43.35%</b>             | <b>70.0</b>            |
| <b>10</b>        | <b>Sponge</b> | <b>GO</b>                              | <b>0.2~1.2</b>              | <b>27.09%</b>             | <b>40.7</b>            |
| <b>11</b>        | <b>Sponge</b> | <b>MXene</b>                           | <b>0.5~3.0</b>              | <b>67.73%</b>             | <b>57.5</b>            |
| <b>12</b>        | <b>Sponge</b> | <b>GaN</b>                             | <b>0.3~1.2</b>              | <b>24.38%</b>             | <b>44.0</b>            |
| <b>This work</b> | <b>Sponge</b> | <b>PEDOT:PSS</b>                       | <b>0.2~3.9</b>              | <b>100%</b>               | <b>57.7</b>            |

**Table S3.** Composition of PPK sponges and control group.

| <b>Composition<br/>Sample</b> | <b>PEDOT:PSS<br/>(ml)</b> | <b>H<sub>2</sub>O (ml)</b> | <b>DMSO (ml)</b> | <b>KGM (g)</b> |
|-------------------------------|---------------------------|----------------------------|------------------|----------------|
| <b>CG</b>                     | <b>10</b>                 | <b>0</b>                   | <b>0</b>         | <b>0</b>       |
| <b>D0</b>                     | <b>10</b>                 | <b>5</b>                   | <b>0</b>         | <b>0.4</b>     |
| <b>D25</b>                    | <b>10</b>                 | <b>4.75</b>                | <b>0.25</b>      | <b>0.4</b>     |
| <b>D50</b>                    | <b>10</b>                 | <b>4.5</b>                 | <b>0.5</b>       | <b>0.4</b>     |
| <b>D75</b>                    | <b>10</b>                 | <b>4.25</b>                | <b>0.75</b>      | <b>0.4</b>     |
| <b>D150</b>                   | <b>10</b>                 | <b>3.5</b>                 | <b>1.5</b>       | <b>0.4</b>     |
| <b>D300</b>                   | <b>10</b>                 | <b>2</b>                   | <b>3</b>         | <b>0.4</b>     |
| <b>D500</b>                   | <b>10</b>                 | <b>0</b>                   | <b>5</b>         | <b>0.4</b>     |

## Reference

- 1 H. Wan, N. Liu, J. Tang, Q. Wen and X. Xiao, *ACS Nano*, 2021, **15**, 13646–13652.
- 2 Z. Cheng, Y. Cao, R. Wang, X. Liu, F. Fan and Y. Huang, *J. Mater. Chem. A*, 2023, **11**, 5593–5605.
- 3 N. Arooj, T. M. Khan, M. Mumtaz, A. Rehman, I. Ahmad, A. Shah, M. U. Hassan and M. Raffi, *ACS Appl. Nano Mater.*, 2023, **6**, 5264–5273.
- 4 Z. Lin, J. Liu, W. Peng, Y. Zhu, Y. Zhao, K. Jiang, M. Peng and Y. Tan, *ACS Nano*, 2020, **14**, 2109–2117.
- 5 S. Li, S. Xu, K. Pan, J. Du and J. Qiu, *Carbon*, 2022, **194**, 127–139.
- 6 N. Arooj, M. Mumtaz, A. Rehman, I. Ahmad, S. Khan, A. Shah, M. Ul Hassan and M. Raffi, *J. Appl. Polym. Sci.*, 2023, **140**, e53790.
- 7 W. Shui, J. Li, H. Wang, Y. Xing, Y. Li, Q. Yang, X. Xiao, Q. Wen and H. Zhang, *Adv. Opt. Mater.*, 2020, **8**, 2001120.
- 8 Y. Cao, Z. Cheng, R. Wang, X. Liu, T. Zhang, F. Fan and Y. Huang, *Carbon*, 2022, **199**, 333–346.
- 9 A. R. Pai, Y. Lu, S. Joseph, N. M. Santhosh, R. Degl’Innocenti, H. Lin, R. Letizia, C. Paoloni and S. Thomas, *Chem. Eng. J.*, 2023, **467**, 143213.
- 10 C. Zhou, K. Zhang, X. Sun, X. Zhao, K. Zheng, J. Mi, F. Qing, Q. Wen and X. Li, *Small Methods*, 2023, **7**, 2201493.
- 11 Q. Xie, Y. Zhao, D. Liang, L. Zhang, Q. Wen, F. Tang, M. Hu, L. Deng and P. Zhou, *ACS Appl. Mater. Interfaces*, 2022, **14**, 57008–57015.
- 12 T. Braniste, S. Zhukov, M. Dragoman, L. Alyabyeva, V. Ciobanu, M. Aldrigo, D. Dragoman, S. Iordanescu, S. Shree, S. Raevschi, R. Adelung, B. Gorshunov and I. Tiginyanu, *Semicond Sci Technol*, 2019, **34**, 12LT02.
